# Supplementary material for: Stereocomplexation of quaternary or ternary monomer units and dual stereocomplexation in enantiomeric binary and quaternary polymer blends of poly(2-hydroxybutanoic acid)s, poly(2-hydroxybutanoic acid-co-lactic acid)s, and poly(lactic acid)s
Source: Royal Society of Chemistry journal article supplement (doi:10.1039/c5ra17096f), 2015-01-01
Supplement: c5ra17096f1.pdf [file c5ra17096f1.pdf]

Supporting Information:

Stereocomplexation of Quaternary or Ternary Monomer Units  
and Dual Stereocomplexation in Enantiomeric Binary and  
Quaternary Polymer Blends of Poly(2-hydroxybutanoic acid)s,  
Poly(2-hydroxybutanoic acid-co-lactic acid)s, and Poly(lactic acid)s

*Hideto Tsuji\* and Tadashi Sobue*

*Department of Environmental and Life Sciences, Graduate School of Engineering,  
Toyohashi University of Technology, Tempaku-cho, Toyohashi, Aichi 441-8580, Japan*

*E-mail: [tsuji@ens.tut.ac.jp](mailto:tsuji@ens.tut.ac.jp)*

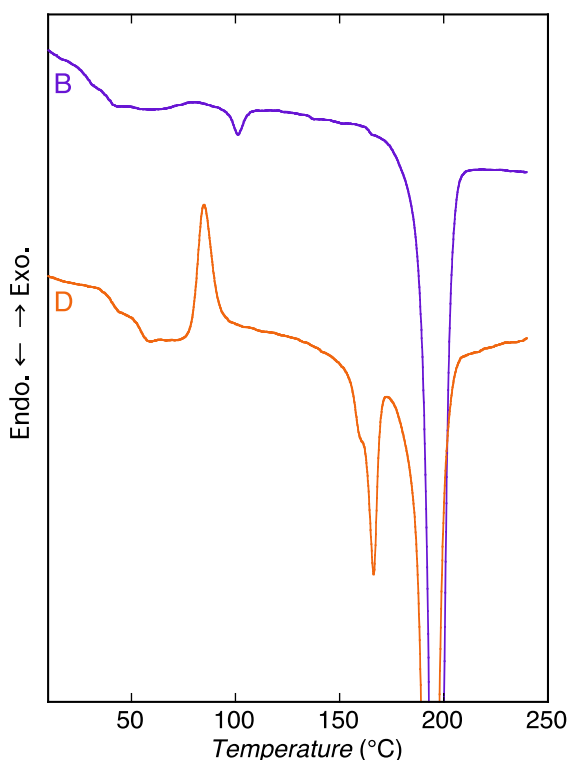

**Figure S1.** Magnified DSC thermograms of melt-crystallized ( $T_c = 160^\circ\text{C}$ ) binary polymer blends. B: P(L-2HB)/P(D-2HB-DLA) blend, D: PLLA/P(D-2HB-DLA) blend.
